# Supplementary material for: An Analysis of the Slowdown in Growth of Spending for Psychiatric Drugs, 1986–2008
Source: Atypon-hosted journal article supplement (doi:10.1176/appi.ps.201100564), 2012-01-01

**Table A1. Brand Approval and Generic Entry for Psychotherapeutic Medications, 2000-2008**

| Drug Class                                         | Brand                |                                       | Generic                            |                    |
|----------------------------------------------------|----------------------|---------------------------------------|------------------------------------|--------------------|
|                                                    | Name                 | Approval Date                         | Name                               | Entry Date         |
| Antidepressants                                    |                      |                                       |                                    |                    |
| <i>SSRIs</i>                                       | Luvox                | 1994                                  | Fluvoxamine                        | 2000               |
|                                                    | Prozac               | 1987                                  | Fluoxetine                         | 2001               |
|                                                    | Paxil                | 1992                                  | Paroxetine                         | 2003               |
|                                                    | Celexa               | 1998                                  | Citalopram                         | 2004               |
|                                                    | Zoloft               | 1991                                  | Sertraline                         | 2006               |
|                                                    | Lexapro              | 2002                                  | Escitalopram                       | 2006               |
| <i>SNRIs</i>                                       | Effexor              | 1993                                  | Venlafaxine                        | 2006               |
|                                                    | Pristiq              | 2008                                  | Desvenlafaxine                     | Brand Only         |
| <i>Norepinephrine-dopamine reuptake inhibitors</i> | Wellbutrin/<br>Zyban | 1985<br>(Wellbutrin),<br>1997 (Zyban) | Bupropion                          | 1996               |
| <i>Second Generation</i>                           | Serzone              | 1994                                  | Nefazodone                         | 2003               |
| <i>MAO Inhibitors</i>                              | Parnate              | 1961                                  | Tranylcypromine                    | 2006               |
|                                                    | Marplan              | Prior to 1982                         | Isocarboxazid                      | Brand Only         |
| <i>Tricyclics/<br/>Tetracyclics</i>                | Remeron              | 1996                                  | Mirtazapine                        | 2003               |
|                                                    | Surmontil            | 1979                                  | Trimipramine                       | 2006               |
|                                                    | Tofranil             | 1984                                  | Imipramine                         | 2008               |
|                                                    | Vivactil             | 1995                                  | Protriptyline                      | 2008               |
|                                                    | Anafranil            | 1989                                  | Clomipramine                       | 1996               |
|                                                    | Norpramin            | Prior to 1982                         | Desipramine                        | 1987               |
|                                                    | Pamelor              | Prior to 1982                         | Nortriptyline                      | 1992               |
|                                                    | Emsam                | 2006                                  | Selegiline<br>transdermal<br>patch | Brand Only         |
| Antipsychotics                                     |                      |                                       |                                    |                    |
| <i>Atypical</i>                                    | Clozaril             | 1989                                  | Clozapine                          | 1996<br>Brand Only |
|                                                    | Abilify              | 2002                                  | Aripiprazole                       | Brand Only         |
|                                                    | Zyprexa              | 1996                                  | Olanzapine                         | Brand Only         |
|                                                    | Risperdal            | 1993                                  | Risperidone                        | 2008<br>Brand Only |
|                                                    | Geodon               | 2001                                  | Ziprasidone                        | Brand Only         |

---

**Table A2. New Indications for Antipsychotic Medications**

---

| <b>Brand Name</b> | <b>Generic Name</b> | <b>New Indication</b>                                                               |
|-------------------|---------------------|-------------------------------------------------------------------------------------|
| Abilify           | Aripiprazole        | Pediatric BPD; adolescent Schizophrenia; adjunctive therapy; adult bipolar disorder |
| Seroquel          | Quetiapine          | Maintenance for bipolar disorder                                                    |
| Risperdal Consta  | Risperidone         | Bipolar I disorder                                                                  |
| Seroquel          | Quetiapine          | Maintenance for bipolar disorder                                                    |
| Seroquel-XR       | Quetiapine          | Bipolar disorder, depression; mania; adjunctive treatment                           |

---

**Table 3A. Psychotropic medication growth rate using complete MarketScan Commercial Claims database and only those contributors who continuously contributed to the MarketScan database over the study time period**

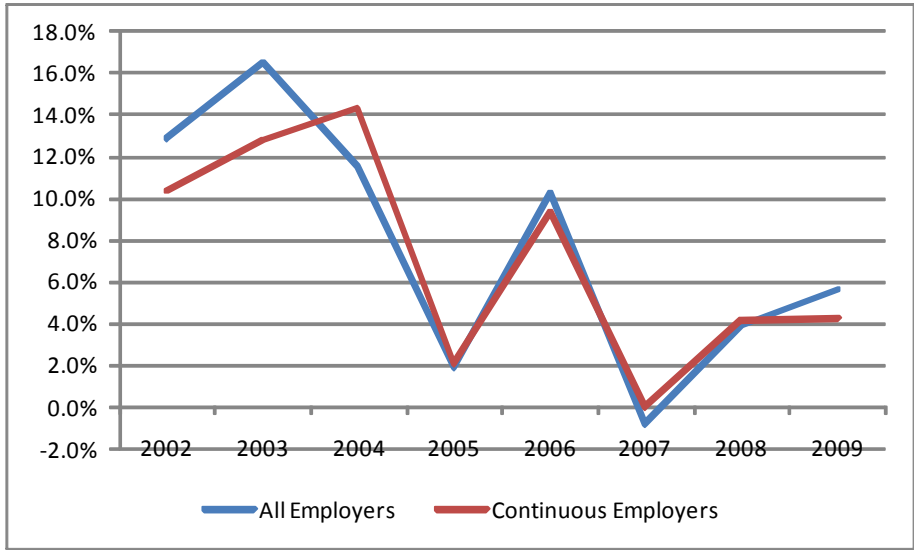

Supplement: pss6301_13_ds.pdf [file pss6301_13_ds.pdf]
